# Supplementary material for: Intensive genetic analysis for Chinese patients with very high triglyceride levels: Relations of mutations to triglyceride levels and acute pancreatitis
Source: PubMed Central journal article supplement — eBioMedicine. 2018 Nov 9;38:171–7. doi: 10.1016/j.ebiom.2018.11.001 (PMC6306308; doi:10.1016/j.ebiom.2018.11.001), 2018-11-09
Supplement: mmc1.pdf [file mmc1.pdf]

**Supplemental Table S1 Association of SHTG and dose of the study SNPs**

| SNP        | Gene    | Nucleotide<br>variation | TG-raising<br>allele | OR    | 95%CI        | P value          |
|------------|---------|-------------------------|----------------------|-------|--------------|------------------|
| rs1367117  | APOB    | c.293C>T                | T                    | 1.132 | 0.474-2.704  | 0.779            |
| rs1042031  | APOB    | c.12541G>A              | A                    | 0.533 | 0.186-1.533  | 0.243            |
| rs13306194 | APOB    | c.1594C>T               | T                    | 0.502 | 0.220-1.146  | 0.102            |
| rs1042034  | APOB    | c.13013G>A              | A                    | 1.411 | 0.843-2.360  | 0.190            |
| rs7205804  | CETP    | -                       | A                    | 0.790 | 0.484-1.289  | 0.346            |
| rs5104     | APOA4   | c.440A>G                | G                    | 2.252 | 1.346-3.767  | <b>0.002</b>     |
| rs651821   | APOA5   | c.-3G>A                 | A                    | 5.612 | 3.049-10.179 | <b>&lt;0.001</b> |
| rs2075291  | APOA5   | c.553G>T                | T                    | 5.866 | 2.045-16.825 | <b>0.001</b>     |
| rs3135507  | APOA5   | c.457G>A                | A                    | 2.293 | 1.164-4.516  | <b>0.016</b>     |
| rs5128     | APOC3   | c.*40G>C                | C                    | 2.173 | 1.270-3.718  | <b>0.005</b>     |
| rs4225     | APOC3   | c.*71G>T                | T                    | 3.200 | 1.574-6.505  | <b>0.001</b>     |
| rs4984948  | LMF1    | c.1685C>G               | G                    | 1.961 | 0.799-3.332  | 0.198            |
| rs8179206  | GCKR    | c.230A>G                | G                    | 1.037 | 0.291-3.689  | 0.935            |
| rs1260326  | GCKR    | c.1337C>T               | T                    | 1.676 | 1.031-2.723  | <b>0.037</b>     |
| rs7412     | APOE    | c.526C>T                | T                    | 3.398 | 1.285-8.987  | <b>0.014</b>     |
| rs440446   | APOE    | c.42C>G                 | G                    | 2.117 | 1.300-3.448  | <b>0.003</b>     |
| rs327      | LPL     | c.1323-90T>G            | G                    | 0.634 | 0.322-1.247  | 0.186            |
| rs328      | LPL     | c.1421C>G               | G                    | 0.536 | 0.137-2.095  | 0.370            |
| rs11538389 | GPHIBP1 | c.41G>T                 | T                    | 1.332 | 0.794-2.236  | 0.278            |

**Supplemental Table S2 Summary of pathogenic/likely pathogenic mutations in 58 patients**

| Subjects        | Gene_Symbol | Nucleotide_Changes         | Amino_Acid    | Type | SIFT_Predi<br>ct | PolyPhen_2_Predict | MutationTaster_Pr<br>edict | Mygeno_InterA<br>CMG | Pathogenic        |
|-----------------|-------------|----------------------------|---------------|------|------------------|--------------------|----------------------------|----------------------|-------------------|
| <b>Controls</b> |             |                            |               |      |                  |                    |                            |                      |                   |
| 1               | LMF1        | c.856C>T                   | p.R286W       | het  | Damaging         | Possibly_damaging  | Disease_causing            | PM2;BP1              | Uncertain         |
| 2               | APOB        | c.7043A>G                  | p.Y2348C      | het  | Damaging         | Benign             | Disease_causing            | -                    | Uncertain         |
| 3               | GPIHBP1     | c.545_546ins<br>AGTACCATTC | p.R182fs      | het  | -                | -                  | -                          | PVS;PM2              | Likely pathogenic |
| 3               | GPIHBP1     | c.547_548insGC             | p.R183fs      | het  | -                | -                  | -                          | PVS;PM2              | Likely pathogenic |
| 4               | APOB        | c.3850C>T                  | p.R1284W      | het  | Damaging         | Probably_damaging  | Polymorphism               | PM2                  | Uncertain         |
| 5               | APOB        | c.3404G>A                  | p.S1135N      | het  | Damaging         | Possibly_damaging  | Polymorphism               | PM2                  | Uncertain         |
| 6               | APOE        | c.425C>T                   | p.A142V       | het  | Tolerated        | Benign             | Disease_causing            | PM2                  | Uncertain         |
| 7               | LMF1        | c.1223C>A                  | p.A408D       | het  | Damaging         | Probably_damaging  | Disease_causing            | PM2;PP3;BP1          | Uncertain         |
| 8               | APOB        | c.4013C>G                  | p.P1338R      | het  | Damaging         | Probably_damaging  | Disease_causing            | PM2;PP3              | Uncertain         |
| 9               | APOB        | c.3301A>G                  | p.I1101V      | het  | Tolerated        | Benign             | Disease_causing            | -                    | Uncertain         |
| 10              | GCKR        | c.307G>A                   | p.V103M       | het  | Damaging         | Probably_damaging  | Disease_causing            | PP3;BS1              | Uncertain         |
| 11              | APOA4       | c.916C>T                   | p.R306W       | het  | Damaging         | Possibly_damaging  | Polymorphism               | -                    | Uncertain         |
| 11              | APOB        | c.1433G>A                  | p.C478Y       | het  | Damaging         | Probably_damaging  | Disease_causing            | PM2;PP3              | Uncertain         |
| 11              | APOB        | c.11303T>C                 | p.I3768T      | het  | Damaging         | Probably_damaging  | Polymorphism               | PS1;PM2              | Likely pathogenic |
| 11              | GCKR        | c.1551G>T                  | p.W517C       | het  | Tolerated        | Possibly_damaging  | Disease_causing            | BS1                  | Uncertain         |
| 12              | APOB        | c.7115_7116insCTCT         | p.E2372Dfs*15 | het  | -                | -                  | -                          | PVS;PM2              | Likely pathogenic |

|    |         |                                   |               |     |   |   |   |             |                   |
|----|---------|-----------------------------------|---------------|-----|---|---|---|-------------|-------------------|
| 12 | APOB    | c.7114_7115insT                   | p.E2372Vfs*14 | het | - | - | - | PVS;PM2     | Likely pathogenic |
| 12 | APOB    | c.4502_4503insCTCT                | p.G1502Sfs*10 | het | - | - | - | PVS;PM2;PM5 | Pathogenic        |
| 12 | APOB    | c.7112_7113insT                   | p.K2371Nfs*15 | het | - | - | - | PVS;PM2     | Likely pathogenic |
| 12 | APOB    | c.5576_5577ins<br>CGAATGGTAC      | p.Q1860Efs*9  | het | - | - | - | PVS;PM2     | Likely pathogenic |
| 12 | GPIHBP1 | c.530_531ins<br>AAGAGTACCATTTCGAC | p.G177fs      | het | - | - | - | PVS;PM2     | Likely pathogenic |

### Cases

|   |         |                                   |               |     |           |                   |                 |             |                   |
|---|---------|-----------------------------------|---------------|-----|-----------|-------------------|-----------------|-------------|-------------------|
| 1 | APOA5   | c.990_993delAACA                  | p.D332Vfs*5   | het | -         | -                 | -               | PVS;PS1;PM2 | Pathogenic        |
| 2 | APOB    | c.7223C>T                         | p.S2408F      | het | Damaging  | Possibly_damaging | Polymorphism    | -           | Uncertain         |
| 3 | ANGPTL3 | c.587T>C                          | p.I196T       | het | Damaging  | Probably_damaging | Disease_causing | -           | Uncertain         |
| 3 | LPL     | c.347G>A                          | p.R116Q       | het | Tolerated | Probably_damaging | Disease_causing | PS1;PM2     | Likely pathogenic |
| 3 | LPL     | c.348_349insAGTACCATTC<br>GACAGTC | p.A117Sfs*61  | het | #N/A      | #N/A              | -               | PVS;PM2     | Likely pathogenic |
| 4 | GPIHBP1 | c.542_543del                      | p.A181fs      | het | #N/A      | #N/A              | -               | PVS;PM2     | Likely pathogenic |
| 5 | APOB    | c.6043G>A                         | p.A2015T      | het | Tolerated | Possibly_damaging | Disease_causing | PM2         | Uncertain         |
| 6 | ANGPTL3 | c.386_387insGTACCATTTCG           | p.E130Yfs*21  | het | -         | -                 | -               | PVS;PM2     | Likely pathogenic |
| 6 | ANGPTL3 | c.801_802insAGAGTAC               | p.Q268Rfs*10  | het | -         | -                 | -               | PVS;PM2     | Likely pathogenic |
| 6 | ANGPTL3 | c.1145C>G                         | p.S382C       | het | Damaging  | Probably_damaging | Disease_causing | PM2;PP3     | Uncertain         |
| 6 | ANGPTL3 | c.1144_1145insAGA                 | p.S382delinsX | het | -         | -                 | -               | PVS;PM2     | Likely pathogenic |
| 6 | ANGPTL3 | c.1148_1149insCA                  | p.W384Ifs*31  | het | -         | -                 | -               | PVS;PM2     | Likely pathogenic |

|   |         |                                           |               |     |          |                   |                 |             |                   |
|---|---------|-------------------------------------------|---------------|-----|----------|-------------------|-----------------|-------------|-------------------|
| 6 | ANGPTL3 | c.1150_1151insC                           | p.W384Sfs*23  | het | -        | -                 | -               | PVS;PM2     | Likely pathogenic |
| 6 | ANGPTL3 | c.1152G>A                                 | p.W384X       | het | -        | -                 | Disease_causing | PVS;PM2     | Likely pathogenic |
| 6 | ANGPTL3 | c.1301G>A                                 | p.W434X       | het | -        | -                 | Disease_causing | PVS;PM2     | Likely pathogenic |
| 6 | APOA1   | c.345_346ins<br>CTCTCGAATGGTACTCT         | p.E116Lfs*8   | hom | -        | -                 | -               | PVS;PM2     | Likely pathogenic |
| 6 | APOA1   | c.615_616insG                             | p.K206Efs*57  | het | -        | -                 | -               | PVS;PM2     | Likely pathogenic |
| 6 | APOA1   | c.617_618insTG                            | p.K206Nfs*20  | het | -        | -                 | -               | PVS;PM2     | Likely pathogenic |
| 6 | APOA1   | c.94_95ins<br>CGTGCTCTCGAAT               | p.W32Sfs*31   | het | -        | -                 | -               | PVS;PM2;PM5 | Pathogenic        |
| 6 | APOA4   | c.494A>T                                  | p.E165V       | hom | Damaging | Possibly_damaging | Polymorphism    | PM2         | Uncertain         |
| 6 | APOA4   | c.492G>C                                  | p.M164I       | het | Damaging | Possibly_damaging | Disease_causing | PM2         | Uncertain         |
| 6 | APOB    | c.10145A>T                                | p.E3382V      | het | Damaging | Probably_damaging | Disease_causing | PM2         | Uncertain         |
| 6 | APOB    | c.13292_13293insTGGTA                     | p.F4432Gfs*47 | het | -        | -                 | -               | PVS;PM2     | Likely pathogenic |
| 6 | APOB    | c.4216_4217ins<br>TGCTCTCGAATGGTACTC<br>T | p.G1406Vfs*14 | het | -        | -                 | -               | PVS;PM2     | Likely pathogenic |
| 6 | APOB    | c.4584_4585insTGGTACTCT<br>A              | p.G1529Wfs*13 | het | -        | -                 | -               | PVS;PM2     | Likely pathogenic |
| 6 | APOB    | c.10146_10147ins<br>CTCTCGAATGGTACTCT     | p.G3383Lfs*11 | het | -        | -                 | -               | PVS;PM2     | Likely pathogenic |

|   |      |                                             |                     |     |          |                   |                 |         |                   |
|---|------|---------------------------------------------|---------------------|-----|----------|-------------------|-----------------|---------|-------------------|
| 6 | APOB | c.12191_12192insGTGCTCT<br>CGAA             | p.G4065Cfs*7        | het | -        | -                 | -               | PVS;PM2 | Likely pathogenic |
| 6 | APOB | c.2757_2758insCGTGCTCTC<br>GAAT             | p.G920Rfs*43        | het | -        | -                 | -               | PVS;PM2 | Likely pathogenic |
| 6 | APOB | c.13358_13359ins<br>TGCTCTCGAATGGTACTC<br>T | p.I4454Afs*31       | het | -        | -                 | -               | PVS;PM2 | Likely pathogenic |
| 6 | APOB | c.958_959insTGGT                            | p.K320Mfs*21        | het | -        | -                 | -               | PVS;PM2 | Likely pathogenic |
| 6 | APOB | c.959_960insCTCT                            | p.K320Nfs*21        | het | -        | -                 | -               | PVS;PM2 | Likely pathogenic |
| 6 | APOB | c.9941_9942insTG                            | p.K3314Nfs*14       | het | -        | -                 | -               | PVS;PM2 | Likely pathogenic |
| 6 | APOB | c.13044_13045insGTACTCT<br>VLX              | p.K4349_E4350delins | het | -        | -                 | -               | PVS;PM2 | Likely pathogenic |
| 6 | APOB | c.4979T>C                                   | p.L1660S            | het | Damaging | Possibly_damaging | Polymorphism    | PM2     | Uncertain         |
| 6 | APOB | c.4992_4993insTC                            | p.L1665Sfs*8        | het | -        | -                 | -               | PVS;PM2 | Likely pathogenic |
| 6 | APOB | c.6055_6056ins<br>GTGCTCTCGAATGG            | p.L2019Rfs*7        | het | -        | -                 | -               | PVS;PM2 | Likely pathogenic |
| 6 | APOB | c.10143A>C                                  | p.L3381F            | het | Damaging | Benign            | Disease_causing | PM2     | Uncertain         |
| 6 | APOB | c.12197_12198delTG                          | p.L4066Sfs*17       | het | -        | -                 | -               | PVS;PM2 | Likely pathogenic |
| 6 | APOB | c.12194_12195insTA                          | p.L4066Tfs*3        | het | -        | -                 | -               | PVS;PM2 | Likely pathogenic |
| 6 | APOB | c.8200_8201ins                              | p.P2734Rfs*36       | het | -        | -                 | -               | PVS;PM2 | Likely pathogenic |

GTGCTCTCGAATGGTACT

CT

|   |      |                        |               |     |          |                   |                 |         |                   |
|---|------|------------------------|---------------|-----|----------|-------------------|-----------------|---------|-------------------|
| 6 | APOB | c.956C>G               | p.P319R       | het | Damaging | Probably_damaging | Disease_causing | PM2     | Uncertain         |
| 6 | APOB | c.4793_4794insCTCGAATG | p.R1599Sfs*14 | het | -        | -                 | -               | PVS;PM2 | Likely pathogenic |
| 6 | APOB | c.7874_7875ins         | p.R2625fs     | het | -        | -                 | -               | PVS;PM2 | Likely pathogenic |

CTCTCGAATGGTACTCT

|   |      |                     |               |     |          |                   |              |         |                   |
|---|------|---------------------|---------------|-----|----------|-------------------|--------------|---------|-------------------|
| 6 | APOB | c.4988G>C           | p.S1663T      | het | Damaging | Possibly_damaging | Polymorphism | PM2     | Uncertain         |
| 6 | APOB | c.560_561insGTGCTCT | p.T188Cfs*21  | het | -        | -                 | -            | PVS;PM2 | Likely pathogenic |
| 6 | APOB | c.561_562insGAATGGT | p.T188Efs*21  | het | -        | -                 | -            | PVS;PM2 | Likely pathogenic |
| 6 | APOB | c.7631_7632ins      | p.T2545Afs*14 | het | -        | -                 | -            | PVS;PM2 | Likely pathogenic |

TGCTCTCGAATGGTACTC

T

|   |      |                    |               |     |   |   |   |             |                   |
|---|------|--------------------|---------------|-----|---|---|---|-------------|-------------------|
| 6 | APOB | c.12201_12202delAA | p.T4068Lfs*15 | het | - | - | - | PVS;PM2     | Likely pathogenic |
| 6 | APOB | c.2888_2889ins     | p.W963Cfs*17  | het | - | - | - | PVS;PM2;PM5 | Pathogenic        |

CTCTCGAATGGTACTCT

|   |      |                       |               |     |          |                   |                               |         |                   |
|---|------|-----------------------|---------------|-----|----------|-------------------|-------------------------------|---------|-------------------|
| 6 | APOB | c.4115_4116insGTGCTCT | p.Y1373Cfs*24 | het | -        | -                 | -                             | PVS;PM2 | Likely pathogenic |
| 6 | APOB | c.5339A>C             | p.Y1780S      | het | Damaging | Probably_damaging | Disease_causing               | PM2     | Uncertain         |
| 6 | APOB | c.5340T>G             | p.Y1780X      | het | -        | -                 | Disease_causing_a<br>utomatic | PVS;PM2 | Likely pathogenic |
| 6 | APOE | c.339_340insAGCAC     | p.E114Sfs*139 | het | -        | -                 | -                             | PVS;PM2 | Likely pathogenic |
| 6 | APOE | c.334_335insCAGAGTA   | p.K113Efs*54  | het | -        | -                 | -                             | PVS;PM2 | Likely pathogenic |

|   |      |                                            |               |     |   |   |   |             |                   |
|---|------|--------------------------------------------|---------------|-----|---|---|---|-------------|-------------------|
| 6 | APOE | c.337_338insTTCG                           | p.K113Ifs*53  | het | - | - | - | PVS;PM2     | Likely pathogenic |
| 6 | CETP | c.353_354ins<br>CCATTCGAGAG                | p.T119Hfs*32  | het | - | - | - | PVS;PM2     | Likely pathogenic |
| 6 | LMF1 | c.1265_1266insTG                           | p.Q422Hfs*45  | het | - | - | - | PVS;PM2     | Likely pathogenic |
| 6 | LPL  | c.501_502ins<br>GAGAGTACCATTCGAGA          | p.A168Efs*10  | het | - | - | - | PVS;PM2     | Likely pathogenic |
| 6 | LPL  | c.1081_1082insAGTA                         | p.A361Efs*4   | het | - | - | - | PVS;PM2;PM5 | Pathogenic        |
| 6 | LPL  | c.1303_1304delGC                           | p.A435Rfs*12  | het | - | - | - | PVS;PM2     | Likely pathogenic |
| 6 | LPL  | c.429_430insGAGA                           | p.E145Rfs*4   | het | - | - | - | PVS;PM2;PM5 | Pathogenic        |
| 6 | LPL  | c.1306_1307ins<br>AGTACCATTC               | p.G436Efs*15  | het | - | - | - | PVS;PM2     | Likely pathogenic |
| 6 | LPL  | c.769_770insCA                             | p.L257Pfs*8   | het | - | - | - | PVS;PM2     | Likely pathogenic |
| 6 | LPL  | c.377_378ins<br>AGAGTACCATT                | p.Y127Efs*49  | het | - | - | - | PVS;PM2     | Likely pathogenic |
| 6 | LPL  | c.1009_1010ins<br>CATTCGAGAG               | p.Y338Ffs*19  | het | - | - | - | PVS;PM2     | Likely pathogenic |
| 7 | APOB | c.8110_8111ins<br>TGCAGTTCGAATGGTACT<br>CT | p.A2704Vfs*26 | het | - | - | - | PVS;PM2     | Likely pathogenic |
| 7 | APOB | c.9140_9141insTCTC                         | p.A3048Lfs*7  | het | - | - | - | PVS;PM2     | Likely pathogenic |
| 7 | APOB | c.8362_8363ins                             | p.G2788Vfs*25 | het | - | - | - | PVS;PM2     | Likely pathogenic |

|    |         |                         |                    |     |           |                   |                 |         |                   |
|----|---------|-------------------------|--------------------|-----|-----------|-------------------|-----------------|---------|-------------------|
|    |         | TTCGAATGGTACTCTG        |                    |     |           |                   |                 |         |                   |
| 7  | APOB    | c.5854_5855insGAATGGT   | p.H1952Rfs*8       | het | -         | -                 | -               | PVS;PM2 | Likely pathogenic |
| 7  | APOB    | c.5855_5856insC         | p.H1953Sfs*5       | het | -         | -                 | -               | PVS;PM2 | Likely pathogenic |
| 7  | APOB    | c.10320_10321insG       | p.K3441Efs*5       | het | -         | -                 | -               | PVS;PM2 | Likely pathogenic |
| 7  | APOB    | c.10322_10323insTG      | p.K3441Nfs*82      | het | -         | -                 | -               | PVS;PM2 | Likely pathogenic |
| 7  | APOB    | c.8080A>T               | p.R2694W           | het | Damaging  | Possibly_damaging | Polymorphism    | PM2     | Uncertain         |
| 7  | APOB    | c.9138_9139insGAATGGT   | p.T3047Efs*9       | het | -         | -                 | -               | PVS;PM2 | Likely pathogenic |
| 7  | GPIHBP1 | c.526_527insA           | p.L176fs           | het | -         | -                 | -               | PVS;PM2 | Likely pathogenic |
| 8  | APOB    | c.5109_5110ins          | p.A1704delinsX     | het | -         | -                 | -               | PVS;PM2 | Likely pathogenic |
|    |         | TAGCGCTTCGAATGGTAC      |                    |     |           |                   |                 |         |                   |
|    |         | TCT                     |                    |     |           |                   |                 |         |                   |
| 8  | APOB    | c.12462_12463insTGGTA   | p.L4155Wfs*4       | het | -         | -                 | -               | PVS;PM2 | Likely pathogenic |
| 8  | APOB    | c.12457C>T              | p.Q4153X           | het | -         | -                 | Disease_causing | PVS;PM2 | Likely pathogenic |
| 9  | APOB    | c.2398C>A               | p.L800M            | het | Tolerated | Possibly_damaging | Disease_causing | -       | Uncertain         |
| 10 | APOA5   | c.104G>A                | p.S35N             | het | Damaging  | Benign            | Polymorphism    | BS1     | Uncertain         |
| 11 | LMF1    | c.1184C>T               | p.T395I            | het | Damaging  | Benign            | Disease_causing | BP1     | Uncertain         |
| 12 | APOB    | c.10579C>T              | p.R3527W           | het | Damaging  | Probably_damaging | Disease_causing | PS1;PP3 | Uncertain         |
| 13 | APOE    | c.403_404insAGTAG       | p.Q135_Y136delinsQ | het | -         | -                 | -               | PVS;PM2 | Likely pathogenic |
|    |         |                         | X                  |     |           |                   |                 |         |                   |
| 13 | APOE    | c.409_410insATTTCGACGTC | p.R137Hfs*32       | het | -         | -                 | -               | PVS;PM2 | Likely pathogenic |
|    |         | ACA                     |                    |     |           |                   |                 |         |                   |



|    |       |                                       |              |     |           |                   |                 |             |                   |
|----|-------|---------------------------------------|--------------|-----|-----------|-------------------|-----------------|-------------|-------------------|
| 14 | APOA4 | c.461G>T                              | p.R154L      | het | Damaging  | Probably_damaging | Polymorphism    | BS1         | Uncertain         |
| 15 | GCKR  | c.680G>A                              | p.R227Q      | het | Tolerated | Possibly_damaging | Polymorphism    | -           | Uncertain         |
| 16 | APOB  | c.3404G>A                             | p.S1135N     | het | Damaging  | Possibly_damaging | Polymorphism    | PM2         | Uncertain         |
| 17 | LMF1  | c.1228G>A                             | p.G410R      | het | Damaging  | Probably_damaging | Disease_causing | BP1         | Uncertain         |
| 18 | LPL   | c.10_11insTTTCG                       | p.K41fs*38   | het | -         | -                 | -               | PVS;PM2     | Likely pathogenic |
| 19 | LMF1  | c.475A>G                              | p.M159V      | het | Tolerated | Benign            | Disease_causing | BP1         | Uncertain         |
| 20 | APOB  | c.12581T>C                            | p.I4194T     | het | Damaging  | Benign            | Polymorphism    | -           | Uncertain         |
| 21 | TRIB1 | c.418C>T                              | p.H140Y      | het | Damaging  | Probably_damaging | Disease_causing | PM2;PP3     | Uncertain         |
| 22 | APOA5 | c.77G>T                               | p.G26V       | het | Tolerated | Possibly_damaging | Disease_causing | PM2         | Uncertain         |
| 23 | LMF1  | c.1228G>A                             | p.G410R      | het | Damaging  | Probably_damaging | Disease_causing | BP1         | Uncertain         |
| 24 | APOB  | c.3404G>A                             | p.S1135N     | het | Damaging  | Possibly_damaging | Polymorphism    | PM2         | Uncertain         |
| 25 | LPL   | c.1015A>C                             | p.K339Q      | het | Damaging  | Possibly_damaging | Disease_causing | PM2;PP3     | Uncertain         |
| 26 | APOB  | c.6551A>G                             | p.Y2184C     | het | Damaging  | Probably_damaging | Polymorphism    | -           | Uncertain         |
| 27 | GCKR  | c.230A>G                              | p.E77G       | het | Damaging  | Benign            | Polymorphism    | BS1         | Uncertain         |
| 27 | APOA5 | c.295G>A                              | p.E99K       | het | Damaging  | Probably_damaging | Disease_causing | PP3         | Uncertain         |
| 28 | APOB  | c.650C>A                              | p.P217H      | het | Damaging  | Probably_damaging | Disease_causing | PM2         | Uncertain         |
| 29 | APOB  | c.1620_1621insGCGCTCTTC<br>GAATGGTACT | p.Q541Afs*16 | het | -         | -                 | -               | PVS;PM2;PM5 | Pathogenic        |
| 29 | LPL   | c.1119_1120insACCATTC                 | p.E374Tfs*11 | het | -         | -                 | -               | PVS;PM2     | Likely pathogenic |
| 29 | LPL   | c.1121_1122insAGAGCGC                 | p.N375Efs*10 | het | -         | -                 | -               | PVS;PM2     | Likely pathogenic |
| 29 | LPL   | c.1115dupA                            | p.S373Efs*2  | het | -         | -                 | -               | PVS;PM2     | Likely pathogenic |

|    |       |                                    |                    |     |           |                   |                 |             |                   |
|----|-------|------------------------------------|--------------------|-----|-----------|-------------------|-----------------|-------------|-------------------|
| 29 | LPL   | c.1106_1107ins<br>CATTCTGAAGAGCG   | p.V370Ifs*9        | het | -         | -                 | -               | PVS;PM2     | Likely pathogenic |
| 30 | LPL   | c.292G>A                           | p.A98T             | het | Tolerated | Probably_damaging | Disease_causing | PS1         | Uncertain         |
| 30 | LPL   | c.836T>G                           | p.L279R            | het | Damaging  | Probably_damaging | Disease_causing | PS1;PM2;PP3 | Likely pathogenic |
| 31 | LMF1  | c.41_42insTGCTACTCGAAT<br>G        | p.L15Afs*18        | het | -         | -                 | -               | PVS;PM2     | Likely pathogenic |
| 32 | APOE  | c.192G>C                           | p.Q64H             | het | Tolerated | Possibly_damaging | Polymorphism    | PS1         | Uncertain         |
| 32 | GCKR  | c.335G>A                           | p.R112Q            | het | Damaging  | Probably_damaging | Polymorphism    | -           | Uncertain         |
| 32 | LPL   | c.338_339ins<br>AGAGTACCATTTCGATAC | p.W113_L114delinsX | het | -         | -                 | -               | PVS;PM2     | Likely pathogenic |
| 32 | TRIB1 | c.55C>A                            | p.L19I             | het | Tolerated | Probably_damaging | Disease_causing | PM2         | Uncertain         |
| 33 | APOA5 | c.659G>T                           | p.S220I            | het | Tolerated | Probably_damaging | Disease_causing | PM2         | Uncertain         |
| 34 | TRIB1 | c.76G>A                            | p.A26T             | het | Tolerated | Probably_damaging | Disease_causing | -           | Uncertain         |
| 35 | GCKR  | c.307G>A                           | p.V103M            | het | Damaging  | Probably_damaging | Disease_causing | PP3;BS1     | Uncertain         |
| 35 | LMF1  | c.790C>T                           | p.R264C            | het | Damaging  | Probably_damaging | Disease_causing | PM2;BP1     | Uncertain         |
| 36 | APOA1 | c.55C>T                            | p.R19W             | het | Tolerated | Benign            | Disease_causing | -           | Uncertain         |
| 37 | GCKR  | c.307G>A                           | p.V103M            | het | Damaging  | Probably_damaging | Disease_causing | PP3;BS1     | Uncertain         |
| 38 | APOB  | c.12581T>C                         | p.I4194T           | het | Damaging  | Benign            | Polymorphism    | -           | Uncertain         |
| 38 | GCKR  | c.832C>G                           | p.H278D            | het | Tolerated | Possibly_damaging | Disease_causing | -           | Uncertain         |
| 38 | LMF1  | c.475A>G                           | p.M159V            | het | Tolerated | Benign            | Disease_causing | BP1         | Uncertain         |
| 39 | GCKR  | c.307G>A                           | p.V103M            | het | Damaging  | Probably_damaging | Disease_causing | PP3;BS1     | Uncertain         |

|    |       |                        |              |     |           |                   |                 |             |                   |
|----|-------|------------------------|--------------|-----|-----------|-------------------|-----------------|-------------|-------------------|
| 40 | LPL   | c.862G>A               | p.A288T      | het | Damaging  | Probably_damaging | Disease_causing | PM2;PP3     | Uncertain         |
| 41 | LPL   | c.835C>G               | p.L279V      | het | Damaging  | Probably_damaging | Disease_causing | PS1;PP3     | Uncertain         |
| 42 | APOE  | c.395G>T               | p.R132L      | het | Damaging  | Probably_damaging | Disease_causing | PM2;PM5;PP3 | Uncertain         |
| 43 | APOB  | c.3584T>C              | p.V1195A     | het | Damaging  | Benign            | Polymorphism    | PM2         | Uncertain         |
| 44 | LMF1  | c.475A>G               | p.M159V      | het | Tolerated | Benign            | Disease_causing | BP1         | Uncertain         |
| 45 | APOA5 | c.667C>T               | p.R223C      | het | Damaging  | Probably_damaging | Disease_causing | PM2;PP3     | Uncertain         |
| 45 | GCKR  | c.1607A>G              | p.E536G      | het | Damaging  | Benign            | Polymorphism    | PM2         | Uncertain         |
| 45 | LMF1  | c.575C>A               | p.T192K      | het | Tolerated | Benign            | Disease_causing | PM2;BP1     | Uncertain         |
| 46 | APOA5 | c.833C>A               | p.S278Y      | het | Damaging  | Probably_damaging | Polymorphism    | PM2;PP3     | Uncertain         |
| 46 | LMF1  | c.1626_1627insGGAAGAGG | p.Y543Gfs*16 | het | -         | -                 | -               | PVS;PM2     | Likely pathogenic |

ATCGGAGCC

---

**Supplemental Table S3 Comparison of TG in admission according to different LPL molecular regulating genetic variant status in patients with severe hypertriglyceridemia**

|                                                                       | TG (mmol/L) |         | P     |
|-----------------------------------------------------------------------|-------------|---------|-------|
| LPL variants vs. no LPL variants                                      | 9.5±3.7     | 9.6±4.0 | >0.05 |
| > 1 variant in LPL related genes vs. no variants in LPL related genes | 9.9±4.6     | 9.5±3.7 | >0.05 |
